# Supplementary material for: Modeling geminate pair dissociation in organic solar cells: high power conversion efficiencies achieved with moderate optical bandgaps
Source: Royal Society of Chemistry journal article supplement (doi:10.1039/c2ee21376a), 2012-01-01
Supplement: c2ee21376a.pdf [file c2ee21376a.pdf]

## Supporting Information

### Modeling Geminate Pair Dissociation in Organic Solar Cells: High Power Conversion Efficiencies Achieved with Moderate Optical Bandgaps

Jonathan D. Servaites,<sup>a,c</sup> Brett M. Savoie,<sup>b,c</sup> Joseph B. Brink,<sup>c,d</sup> Tobin J. Marks,<sup>a,b,c\*</sup> and Mark A. Ratner<sup>a,b,c\*</sup>

<sup>a</sup> Department of Materials Science and Engineering, 2145 Sheridan Road, Evanston, IL 60208 USA.

<sup>b</sup> Department of Chemistry, Northwestern University, 2145 Sheridan Road, Evanston, IL 60208 USA. Tel: 847-491-5652; E-mail: [ratner@northwestern.edu](mailto:ratner@northwestern.edu); [t-marks@northwestern.edu](mailto:t-marks@northwestern.edu)

<sup>c</sup> Argonne-Northwestern Solar Energy Research Center 2145 Sheridan Road, Evanston, IL 60208 USA. Fax: 847-467-1425; Tel: 847-467-4910; E-mail: [ANSER@Northwestern.edu](mailto:ANSER@Northwestern.edu)

<sup>d</sup> School of Engineering & Applied Science, Yale University, 10 Hillhouse Avenue, New Haven, CT 06511 USA.

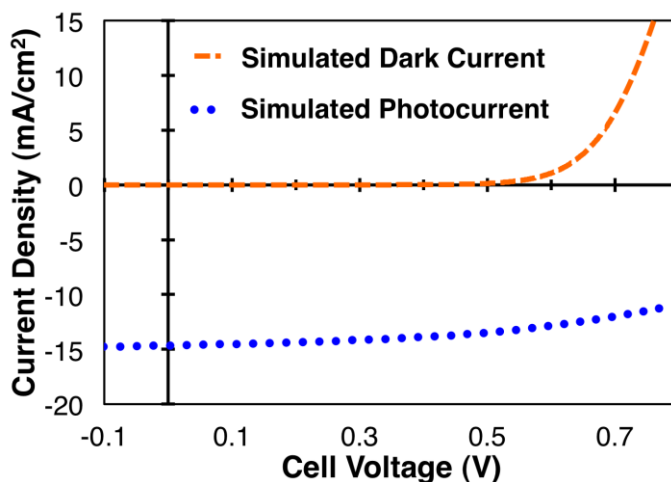

**Figure S11. Simulated Photocurrent and Dark Current.** The photocurrent and dark current are calculated with the same parameters as Fig. 2 described in the main text. The net current is obtained by summing the dark and photocurrents.

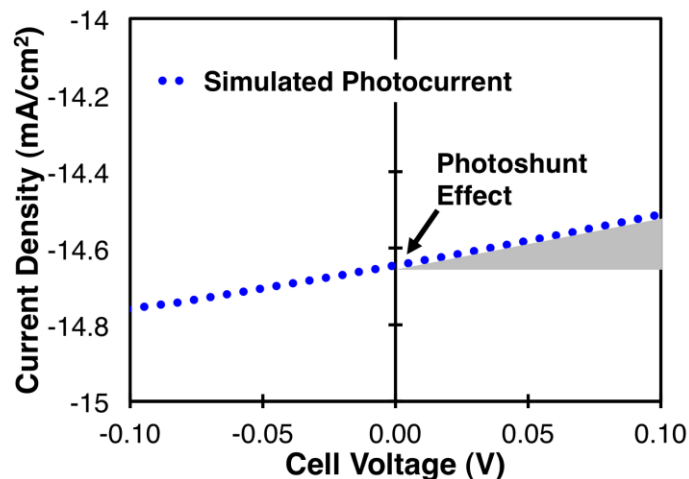

**Figure SI2. Apparent Shunt Resistance.** This figure shows the same photocurrent plotted in Fig. SI1, where the scale has been adjusted to highlight the apparent shunt effect. We note that this effect arises from the field dependence of exciton dissociation described by our model, and should not be confused with the traditional diode sources of shunt resistance, such as pinholes.

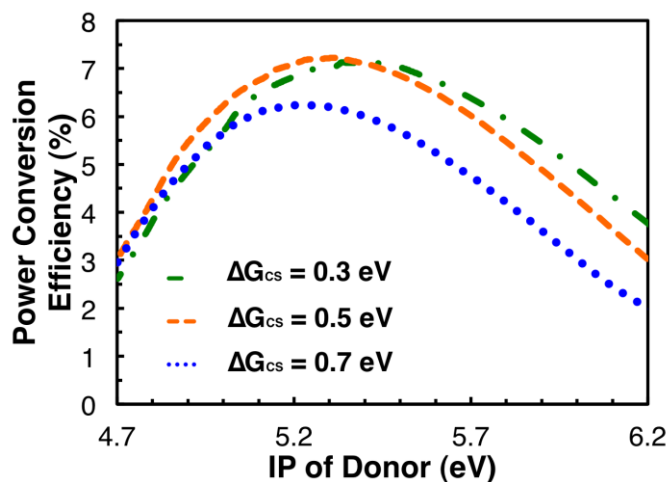

**Figure SI3. Dependence of PCE on the IP of the Donor.** PCE is calculated here assuming a constant  $\Delta G_{CS}$  as indicated for each curve and an electron affinity of 4.0 eV for PCBM. Increasing IP yields an increased device voltage that benefits efficiency until the apogee. Past the maximum, further increases in voltage are offset by incomplete light absorption (current losses). Decreasing  $\Delta G_{CS}$  also increases possible efficiencies up to a point. Further voltage gains from lowering  $\Delta G_{CS}$  below the optimum are offset by incomplete exciton dissociation.
